# Supplementary material for: Colistin sulfate is effective and safe in the treatment of severe pneumonia patients with CRE resistance: a retrospective cohort study
Source: Research Square preprint supplement (doi:10.21203/rs.3.rs-4916931/v1), 2024-10-14
Supplement: Supplementary file 1 [file 9c5a5fe8dd52047202ff1605.docx]

**Table 1. Clinical characteristics of patients with different colistin schemes.**

|  | **Colistin + Tigecycline (TC) *n*=46** | **Colistin + other antibiotics (OC)**  ***n*=38** | ***P*-value** |
| --- | --- | --- | --- |
| Age, years (mean±SD)  Gender, male  Chronic pulmonary disease  Malignancy  Neurological disease  Diabetes  Chronic kidney disease  Other chronic disease  With extrapulmonary infection  Laboratory tests  Positive sputum smear  Positive sputum culture  Respiratory pathogen test positive  GM test  **Treatment received in hospital**  Systemic corticosteroids  Antiviral  Antifungal  Colistin dosage (75000u, %)  Atomize Colistin (Venous+nebulization, %)  **Outcomes**  CT image improvement  Hospitalization days (mean ± SD)  Mortality within 28 days of discharge | 66.8±14.9  13（28.3%）  14（30.4%）  9（19.6%）  14（30.4%）  1（2.2%）  14（30.4%）  31（67.4%）  28（60.9%）  5（10.9%）  33（71.7%）  13（28.3%）  4（8.7%）  9（19.6%）  1（2.2%）  36（78.3%）  15（32.6%）  11（23.9%）  21（80.8%）  34.6±27.8  18（39.1%） | 67.2±14.9  10（26.3%）  17（44.7%）  9（23.7%）  5（13.2%）  4（10.5%）  4（10.5%）  34（89.5%）  26（68.4%）    2（5.3%）  22（57.9%）  11（28.9%）  2（5.3%）  7（18.4%）  0（0%）  21（55.3%）  6（15.8%）  6（15.8%）  12（63.2%）  34.9±38.9  24（63.2%） | *P*=0.919  *P*=1.000  *P*=0.256  *P*=0.790  *P*=0.071  *P*=0.171  *P*=0.034  *P*=0.019  *P*=0.502  *P*=0.449  *P*=0.249  *P*=1.000  *P*=0.685  *P*=1.000  *P*=1.000  *P*=0.035  *P*=0.084  *P*=0.421  *P*=0.306  *P*=0.968  *P*=0.048 |

|  | **Univariate analysis** | | | | **Multivariate analysis** | | | |
| --- | --- | --- | --- | --- | --- | --- | --- | --- |
| **Mortality within 28 days of discharge** | **OR** | **Lower.95** | **Upper.95** | ***P*-value** | **OR** | **Lower.95** | **Upper.95** | ***P*-value** |
| Overall (*n*=84)  Positive sputum culture (*n*=55)  Negative sputum culture (*n*=29) | 0.375  0.233  0.907 | 0.155  0.074  0.208 | 0.910  0.739  3.952 | *P*=0.030  *P*=0.013  *P*=0.897 | 0.180  0.073  0.090 | 0.040  0.006  0.000 | 0.813  0.882  16.712 | *P*=0.026  *P*=0.040  *P*=0.367 |

**Table 2. Univariate and multivariate analysis of different treatment regimens and 28-day disease-related mortality after discharge.**

**Table 3. Comparison of blood biochemical indicators before and after the use of colistin.**

| **Laboratory tests** | **Before Colistin**  **(*n*=84)** | **After Colistin**  **(*n*=84)** | ***P*-value** |
| --- | --- | --- | --- |
| WBC (median ± IQR) ×10⁹  Neutrophil percentage (median ± IQR)  Lymphocyte percentage (median ± IQR)  Platelet count (median ± IQR) ×10⁹  CRP (median ± IQR) – mg/dL  PCT (median ± IQR) – ng/mL  ALT (median ± IQR) – U/mL  AST (median ± IQR) – U/mL  Total bilirubin (median ± IQR) – umol/L  Creatinine, male (median ± IQR) – umol/L  Creatinine, female (median ± IQR) – umol/L | 9.3 (5.2-14.3)  86.7 (76.6-92.1)  7.8 (3.6-13.3)  164 (90-241)  100.3 (28.6-163.7)  0.5 (0.2-2.7)  36.0 (18.0-54.0)  40.0 (24.0-61.0)  11.4 (7.2-16.3)  81.3 (54.6-128.6)  53.0 (38.0-80.3) | 9.6 (5.6-14.2)  86.4 (74.8-92.6)  7.7 (3.9-12.3)  145.5 (74.8-292.5)  90.6 (31.4-156.5)  1.3 (0.1-5.4)  33.0 (16.0-54.0)  35.0 (25.0-57.8)  15.1 (8.0-22.5)  75.5 (54.7-171.5)  41.4 (31.0-64.4) | ***P*=0.697**  ***P*=0.773**  ***P*=0.793**  ***P*=0.965**  ***P*=0.763**  ***P*=0.521**  ***P*=0.704**  ***P*=0.823**  ***P*=0.030**  ***P*=0.882**  ***P*=0.149** |
